23. Scibilia GD, Ehlers WH, Donshik PC: The effects of therapeutic contact lenses on intraocular pressure measurement. *CLAO J* 1996; 22:262-5
24. Byrne SF, Green RL: *Ultrasound of the Eye and Orbit*, 2nd edition. St. Louis, Mosby, 2002, pp 28-9
25. Helmke K, Hansen HC: Fundamentals of transorbital sonographic evaluation of optic nerve sheath expansion under intracranial hypertension. I. Experimental study. *Pediatr Radiol* 1996; 26:701-5
26. Romagnuolo L, Tayal V, Tomaszewski C, Saunders T, Norton HJ: Optic nerve sheath diameter does not change with patient position. *Am J Emerg Med* 2005; 23:686-8
27. Dunker S, Hsu HY, Sebag J, Sadun AA: Perioperative risk factors for posterior ischemic optic neuropathy. *J Am Coll Surg* 2002; 194:705-10
28. Gerling J, Janknecht P, Hansen LL, Kommerell G: Diameter of the optic nerve in idiopathic optic neuritis and in anterior ischemic optic neuropathy. *Int Ophthalmol* 1997; 21:131-5
29. Levin LA, Danesh-Meyer HV: Hypothesis: A venous etiology for nonarteritic ischemic optic neuropathy. *Arch Ophthalmol* 2008; 126:1582-5
30. Reddy A, Foroozan R, Edmond JC, Hinckley LK: Dilated superior ophthalmic veins and posterior ischemic optic neuropathy after prolonged spine surgery. *J Neuroophthalmol* 2008; 28:327-8
31. Moretti R, Pizzi B: Optic nerve ultrasound for detection of intracranial hypertension in intracranial hemorrhage patients: Confirmation of previous findings in a different patient population. *J Neurosurg Anesthesiol* 2009; 21: 16-20

## ANESTHESIOLOGY REFLECTIONS

### Hales' 1733 *Haemastaticks*

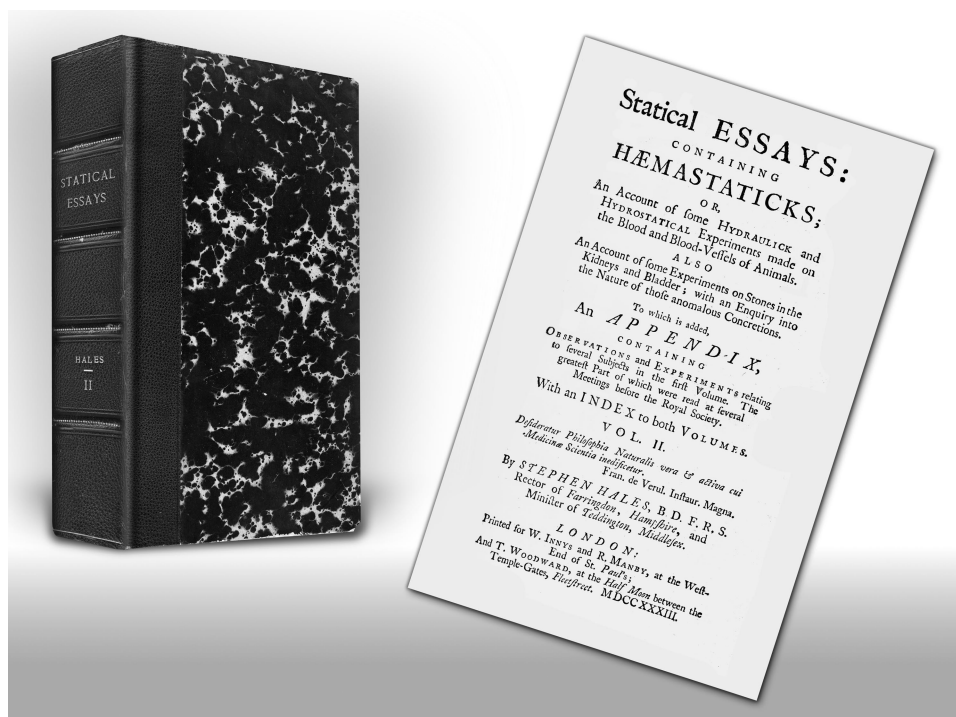

In 1733 the Reverend Stephen Hales (1677–1761) recorded in his *Haemastaticks* volume of *Statical Essays* how, years earlier, he had conducted the first direct measurement of arterial blood pressure. The English physiologist and clergyman wrote, "I caused a mare to be tied down alive on her back; she was . . . neither very lean, nor yet lusty. Having laid open the left crural Artery about three inches from her belly, I inserted into it a brass Pipe, whose bore was one-sixth of an inch in diameter; and to that, by means of another brass Pipe which was fitly adapted to it, I fixed a glass Tube, of nearly the same diameter, which was nine feet in Length. Then untying the Ligature on the Artery, the blood rose in the Tube eight feet three inches perpendicular above the level of the left Ventricle of the Heart." (Copyright © the American Society of Anesthesiologists, Inc. This image appears in color in the *Anesthesiology Reflections* online collection available at [www.anesthesiology.org](http://www.anesthesiology.org).)

George S. Bause, M.D., M.P.H., Honorary Curator, ASA's Wood Library-Museum of Anesthesiology, Park Ridge, Illinois, and Clinical Associate Professor, Case Western Reserve University, Cleveland, Ohio. [UJYC@aol.com](mailto:UJYC@aol.com).
